# Supplementary material
Source: PubMed Central journal article supplement (PMC6234101)
Supplement: NIHMS986559-supplement-1.pdf [file NIHMS986559-supplement-1.pdf]

**Supplemental Table I.** Baseline patient characteristics subdivided by disease activity and damage categories

| Characteristic                                       | Baseline<br>CLASI-A $\leq 9$ ,<br>N = 50 | Baseline<br>CLASI-A<br>>9, N = 33 | Baseline<br>CLASI-D<br>0-4, N = 36 | Baseline<br>CLASI-D 5-9,<br>N = 19 | Baseline<br>CLASI-D $\geq 10$ ,<br>N = 28 |
|------------------------------------------------------|------------------------------------------|-----------------------------------|------------------------------------|------------------------------------|-------------------------------------------|
| CLASI-A, mean (SD)                                   | 3.70 (2.68)                              | 20.97 (8.86)                      | 8.94 (10.21)                       | 7.00 (7.99)                        | 15.07 (10.69)                             |
| CLASI-D, mean (SD)                                   | 5.16 (4.95)                              | 13.79 (12.54)                     | 1.31 (1.65)                        | 6.32 (1.06)                        | 19.50 (9.13)                              |
| Sex, n (%)                                           |                                          |                                   |                                    |                                    |                                           |
| Female                                               | 39 (78.00)                               | 29 (87.88)                        | 31 (86.11)                         | 14 (73.68)                         | 23 (82.14)                                |
| Male                                                 | 11 (22.00)                               | 4 (12.12)                         | 5 (13.89)                          | 5 (26.32)                          | 5 (17.86)                                 |
| Race, n (%)                                          |                                          |                                   |                                    |                                    |                                           |
| White                                                | 31 (62.00)                               | 18 (54.55)                        | 30 (83.33)                         | 11 (57.89)                         | 8 (28.57)                                 |
| Black                                                | 18 (36.00)                               | 11 (33.33)                        | 4 (11.11)                          | 7 (36.84)                          | 18 (64.29)                                |
| Hispanic/Latino                                      | 1 (2.00)                                 | 3 (9.09)                          | 2 (5.56)                           | 0 (0)                              | 2 (7.14)                                  |
| Asian                                                | 0 (0)                                    | 1 (3.03)                          | 0 (0)                              | 1 (5.26)                           | 0 (0)                                     |
| Age at diagnosis, years, mean (SD)                   | 40.18 (14.98)                            | 37.54 (14.95)                     | 45.89 (15.53)                      | 35.63 (15.72)                      | 32.56 (9.06)                              |
| Age at first visit, years, mean (SD)                 | 50.38 (12.56)                            | 46.91 (12.08)                     | 51.79 (13.35)                      | 47.84 (12.38)                      | 46.20 (10.75)                             |
| Predominant CLE subtype                              |                                          |                                   |                                    |                                    |                                           |
| Discoid LE                                           | 36 (72.00)                               | 21 (63.64)                        | 16 (44.44)                         | 16 (84.21)                         | 25 (89.29)                                |
| Localized                                            | 25 (50.00)                               | 6 (18.18)                         | 11 (30.56)                         | 14 (73.68)                         | 6 (21.43)                                 |
| Generalized                                          | 11 (22.00)                               | 15 (45.45)                        | 5 (13.89)                          | 2 (10.53)                          | 19 (67.86)                                |
| Subacute LE                                          | 14 (28.00)                               | 12 (36.36)                        | 20 (55.56)                         | 3 (15.79)                          | 3 (10.71)                                 |
| Annular                                              | 4 (8.00)                                 | 4 (12.12)                         | 7 (19.44)                          | 0 (0)                              | 1 (3.57)                                  |
| Papulosquamous                                       | 12 (24.00)                               | 10 (30.30)                        | 17 (47.22)                         | 3 (15.79)                          | 2 (7.14)                                  |
| Systemic LE involvement, n (%)                       | 13 (26.00)                               | 10 (30.30)                        | 6 (16.67)                          | 4 (21.05)                          | 13 (46.43)                                |
| Discoid                                              | 10 (20.00)                               | 10 (30.30)                        | 3 (8.33)                           | 4 (21.05)                          | 13 (46.43)                                |
| Localized                                            | 5 (10.00)                                | 2 (6.06)                          | 2 (5.56)                           | 4 (21.05)                          | 1 (3.57)                                  |
| Generalized                                          | 5 (10.00)                                | 8 (24.24)                         | 1 (2.78)                           | 0 (0)                              | 12 (42.86)                                |
| Subacute                                             | 3 (6.00)                                 | 0 (0)                             | 3 (8.33)                           | 0 (0)                              | 0 (0)                                     |
| Annular                                              | 0 (0)                                    | 0 (0)                             | 0 (0)                              | 0 (0)                              | 0 (0)                                     |
| Papulosquamous                                       | 3 (6.00)                                 | 0 (0)                             | 3 (8.33)                           | 0 (0)                              | 0 (0)                                     |
| Disease duration at baseline visit, years, mean (SD) | 10.11 (12.24)                            | 9.37 (8.61)                       | 5.90 (8.68)                        | 12.21 (14.69)                      | 13.35 (8.91)                              |
| Duration of follow-up per patient, years, mean (SD)  | 4.06 (1.84)                              | 3.52 (1.89)                       | 3.60 (1.51)                        | 4.21 (2.00)                        | 3.92 (2.19)                               |
| No. follow-up visits per patient, mean (SD)          | 7.43 (3.00)                              | 7.70 (4.71)                       | 6.83 (3.06)                        | 7.84 (3.35)                        | 8.21 (4.68)                               |
| Smoking status, n (%)                                |                                          |                                   |                                    |                                    |                                           |
| Nonsmoker                                            | 26 (52.00)                               | 12 (36.36)                        | 18 (50.00)                         | 11 (57.89)                         | 9 (32.14)                                 |
| Current smoker                                       | 16 (32.00)                               | 17 (51.52)                        | 12 (33.33)                         | 5 (26.32)                          | 16 (57.14)                                |
| Past smoker                                          | 8 (16.00)                                | 4 (12.12)                         | 6 (16.67)                          | 3 (15.79)                          | 3 (10.71)                                 |

CLASI-A, Cutaneous Lupus Erythematosus Disease Area and Severity Index activity; CLASI-D, Cutaneous Lupus Erythematosus Disease Area and Severity Index damage; CLE, cutaneous lupus erythematosus; LE, lupus erythematosus; SD, standard deviation.

**Supplemental Table II.** Patient characteristics and disease activity, average change score and variability over time

| Patient characteristic                    | N  | Average change in<br>CLASI-A score,<br>mean (SD) | Disease progression,<br>n (%) |                  |            | Variability over time<br>flares/year, mean (SD) |
|-------------------------------------------|----|--------------------------------------------------|-------------------------------|------------------|------------|-------------------------------------------------|
|                                           |    |                                                  | Improved                      | Stable           | Worsened   |                                                 |
| Baseline CLASI-A score                    |    |                                                  |                               |                  |            |                                                 |
| ≤9                                        | 50 | 0.93 (4.20)                                      | 7 (14.00)                     | 31 (62.00)       | 12 (24.00) | 0.5 (0.31)                                      |
| >9                                        | 33 | -6.71 (7.93)                                     | 24 (72.73)                    | 7 (21.21)        | 2 (6.06)   | 0.53 (0.59)                                     |
| P value                                   |    | <b>&lt;.0001</b>                                 |                               | <b>&lt;.0001</b> |            | .75                                             |
| Baseline CLASI-D score                    |    |                                                  |                               |                  |            |                                                 |
| 0-4                                       | 36 | -1.77 (7.95)                                     | 10 (27.78)                    | 20 (55.56)       | 6 (16.67)  | 0.54 (0.36)                                     |
| 5-9                                       | 19 | 1.49 (7.66)                                      | 7 (36.84)                     | 9 (47.37)        | 3 (15.79)  | 0.42 (0.28)                                     |
| ≥10                                       | 28 | -2.96 (5.21)                                     | 14 (50.00)                    | 9 (32.14)        | 5 (17.86)  | 0.55 (0.60)                                     |
| P value                                   |    | .35                                              |                               | .40              |            | .53                                             |
| Sex                                       |    |                                                  |                               |                  |            |                                                 |
| Female                                    | 68 | -1.94 (6.52)                                     | 25 (36.76)                    | 32 (47.06)       | 11 (16.18) | 0.54 (0.47)                                     |
| Male                                      | 15 | -2.89 (9.18)                                     | 6 (40.00)                     | 6 (40.00)        | 3 (20.00)  | 0.39 (0.26)                                     |
| P value                                   |    | .97                                              | .87                           |                  |            | .13                                             |
| Race                                      |    |                                                  |                               |                  |            |                                                 |
| White                                     | 49 | -2.52 (8.36)                                     | 19 (38.78)                    | 21 (42.86)       | 9 (18.37)  | 0.51 (0.36)                                     |
| Black                                     | 29 | -1.03 (3.75)                                     | 8 (27.59)                     | 17 (58.62)       | 4 (13.79)  | 0.53 (0.59)                                     |
| Other                                     | 5  | -4.36 (7.37)                                     | 4 (80.00)                     | 0 (0)            | 1 (20.00)  | 0.52 (0.21)                                     |
| P value                                   |    | .38                                              | .14                           |                  |            | .85                                             |
| Age at first visit, years                 |    |                                                  |                               |                  |            |                                                 |
| ≤50                                       | 46 | -1.14 (6.72)                                     | 17 (36.96)                    | 19 (41.30)       | 10 (21.74) | 0.48 (0.34)                                     |
| >50                                       | 37 | -3.31 (7.27)                                     | 14 (37.84)                    | 19 (51.35)       | 4 (10.81)  | 0.56 (0.54)                                     |
| P value                                   |    | .24                                              | .39                           |                  |            | NA                                              |
| CLE subtype                               |    |                                                  |                               |                  |            |                                                 |
| Localized DLE                             | 31 | -0.98 (2.94)                                     | 10 (32.26)                    | 19 (61.29)       | 2 (6.45)   | 0.53 (0.52)                                     |
| Generalized DLE                           | 26 | -1.86 (5.18)                                     | 9 (34.62)                     | 13 (50.00)       | 4 (15.38)  | 0.57 (0.35)                                     |
| SACLE                                     | 26 | -3.70 (10.95)                                    | 12 (46.15)                    | 6 (23.08)        | 8 (30.77)  | 0.52 (0.43)                                     |
| P value                                   |    | .76                                              |                               | <b>.03</b>       |            | .71                                             |
| Systemic LE Involvement                   |    |                                                  |                               |                  |            |                                                 |
| No                                        | 60 | -2.34 (7.68)                                     | 23 (38.33)                    | 27 (45.00)       | 10 (16.67) | 0.53 (0.48)                                     |
| Yes                                       | 23 | -1.51 (4.99)                                     | 8 (34.78)                     | 11 (47.83)       | 4 (17.39)  | 0.46 (0.31)                                     |
| P value                                   |    | .97                                              | .96                           |                  |            | .78                                             |
| Disease duration at baseline visit, years |    |                                                  |                               |                  |            |                                                 |
| >1                                        | 65 | -1.47 (6.30)                                     | 23 (35.38)                    | 30 (46.15)       | 12 (18.46) | 0.51 (0.46)                                     |
| ≤1                                        | 18 | -4.43 (8.99)                                     | 8 (44.44)                     | 8 (44.44)        | 2 (16.67)  | 0.55 (0.40)                                     |
| P value                                   |    | .38                                              | .68                           |                  |            | .55                                             |
| Smoking status                            |    |                                                  |                               |                  |            |                                                 |
| Current smoker                            | 33 | -2.10 (8.26)                                     | 12 (36.36)                    | 12 (36.36)       | 9 (27.27)  | 0.46 (0.34)                                     |
| Past or never smoker                      | 50 | -2.12 (6.15)                                     | 19 (38.00)                    | 26 (52.00)       | 5 (10.00)  | 0.55 (0.50)                                     |
| P value                                   |    | .23                                              | .10                           |                  |            | .76                                             |

Statistically significant values are in bold.

CLASI-A, Cutaneous Lupus Erythematosus Disease Area and Severity Index activity; CLASI-D, Cutaneous Lupus Erythematosus Disease Area and Severity Index damage; CLE, cutaneous lupus erythematosus; DLE, discoid lupus erythematosus; LE, lupus erythematosus; NA, not applicable; SACLE, subacute lupus erythematosus; SD, standard deviation.

**Supplemental Table III.** Patient characteristics associated with disease damage and average change score

| Patient characteristic                    | N  | Average change in CLASI-D score,<br>mean (SD) | Disease progression, n (%) |            |            |
|-------------------------------------------|----|-----------------------------------------------|----------------------------|------------|------------|
|                                           |    |                                               | Improved                   | Stable     | Worsened   |
| Baseline CLASI-A score                    |    |                                               |                            |            |            |
| ≤9                                        | 50 | 0.70 (3.06)                                   | 5 (10.00)                  | 36 (72.00) | 9 (18.00)  |
| >9                                        | 33 | 0.84 (5.09)                                   | 6 (18.18)                  | 18 (54.55) | 9 (27.27)  |
| <i>P</i> value                            |    | .46                                           | .26                        |            |            |
| Baseline CLASI-D score                    |    |                                               |                            |            |            |
| 0-4                                       | 36 | 1.81 (2.35)                                   | 0 (0)                      | 29 (80.56) | 7 (19.44)  |
| 5-9                                       | 19 | 1.52 (3.82)                                   | 1 (5.26)                   | 13 (68.42) | 5 (26.32)  |
| ≥10                                       | 28 | -1.12 (5.02)                                  | 10 (35.71)                 | 12 (42.86) | 6 (21.43)  |
| <i>P</i> value                            |    | <b>.004</b>                                   | <b>.0005</b>               |            |            |
| Sex                                       |    |                                               |                            |            |            |
| Female                                    | 68 | 0.83 (3.85)                                   | 8 (11.76)                  | 45 (66.18) | 15 (22.06) |
| Male                                      | 15 | 0.39 (4.56)                                   | 3 (20.00)                  | 9 (60.00)  | 3 (20.00)  |
| <i>P</i> value                            |    | .58                                           | .70                        |            |            |
| Race                                      |    |                                               |                            |            |            |
| White                                     | 49 | 0.75 (4.08)                                   | 6 (12.24)                  | 34 (69.39) | 9 (18.37)  |
| Black                                     | 29 | 1.15 (3.93)                                   | 4 (13.79)                  | 16 (55.17) | 9 (31.03)  |
| Other                                     | 5  | -1.54 (2.55)                                  | 1 (20.00)                  | 4 (80.00)  | 0 (0)      |
| <i>P</i> value                            |    | .17                                           | .48                        |            |            |
| Age at first visit, years                 |    |                                               |                            |            |            |
| ≤50                                       | 46 | 1.08 (3.77)                                   | 6 (13.04)                  | 29 (63.04) | 11 (23.91) |
| >50                                       | 37 | 0.35 (4.21)                                   | 5 (13.51)                  | 25 (67.57) | 7 (18.92)  |
| <i>P</i> value                            |    | .36                                           | .86                        |            |            |
| CLE subtype                               |    |                                               |                            |            |            |
| Localized DLE                             | 31 | 0.68 (3.14)                                   | 3 (9.68)                   | 24 (77.42) | 4 (12.90)  |
| Generalized DLE                           | 26 | 0.65 (5.03)                                   | 5 (19.23)                  | 12 (46.15) | 9 (34.62)  |
| SCLE                                      | 26 | 0.95 (3.98)                                   | 3 (11.54)                  | 18 (69.23) | 5 (19.23)  |
| <i>P</i> value                            |    | .92                                           | .17                        |            |            |
| Systemic LE involvement                   |    |                                               |                            |            |            |
| No                                        | 60 | 0.82 (3.92)                                   | 7 (11.67)                  | 41 (68.33) | 12 (20.00) |
| Yes                                       | 23 | 0.57 (4.17)                                   | 4 (17.39)                  | 13 (56.52) | 6 (26.09)  |
| <i>P</i> value                            |    | .88                                           | .59                        |            |            |
| Disease Duration at baseline visit, years |    |                                               |                            |            |            |
| >1                                        | 65 | 0.25 (4.04)                                   | 11 (16.92)                 | 42 (64.62) | 12 (18.46) |
| ≤1                                        | 18 | 2.57 (3.15)                                   | 0 (0)                      | 12 (66.67) | 6 (33.33)  |
| <i>P</i> value                            |    | <b>.02</b>                                    | .11                        |            |            |
| Smoking status                            |    |                                               |                            |            |            |
| Current smoker                            | 33 | 0.42 (4.66)                                   | 6 (18.18)                  | 20 (60.61) | 7 (21.21)  |
| Past or never smoker                      | 50 | 0.97 (3.46)                                   | 5 (10.00)                  | 34 (68.00) | 11 (22.00) |
| <i>P</i> value                            |    | .73                                           | .55                        |            |            |

Statistically significant values are in bold.

CLASI-A, Cutaneous Lupus Erythematosus Disease Area and Severity Index activity; CLASI-D, Cutaneous Lupus Erythematosus Disease Area and Severity Index damage; CLE, cutaneous lupus erythematosus; DLE, discoid lupus erythematosus; LE, lupus erythematosus; SCLE, subacute lupus erythematosus; SD, standard deviation.
